# Supplementary material
Source: PubMed Central journal article supplement (PMC1852883)
Supplement: cmaj_176_9_1279__1.pdf [file cmaj_176_9_1279__1.pdf]

**Appendix 1: Results of hierarchical regression analyses comparing changes in sick leave from the 6 months before the disaster event to afterward, between study-group rescue workers and uninvolved controls**

| Postdisaster period; sickness absence comparison measure* (95% confidence interval) |                                                  |                    |             |                    |               |                    |                          |                  |
|-------------------------------------------------------------------------------------|--------------------------------------------------|--------------------|-------------|--------------------|---------------|--------------------|--------------------------|------------------|
| Absence statistic<br>Health cluster                                                 | Year 1                                           |                    |             |                    | Years 2 and 3 |                    |                          |                  |
|                                                                                     | Months 1-6                                       |                    | Months 7-12 |                    | Months 13-36  |                    | Stability of difference† |                  |
| <b>Prevalence‡</b>                                                                  |                                                  |                    |             |                    |               |                    |                          |                  |
|                                                                                     | <b>Odds ratios</b>                               |                    |             |                    |               |                    |                          |                  |
| Gastrointestinal                                                                    | 0.98                                             | (0.43 to 2.24)     | 0.78        | (0.36 to 1.70)     | 1.36          | (0.58 to 3.18)     | 0.72                     | (0.59 to 0.89)§  |
| Musculoskeletal                                                                     | 1.76                                             | (1.17 to 2.62)§    | 1.66        | (1.11 to 2.48)¶    | 1.55          | (1.00 to 2.39)¶    | 1.06                     | (0.93 to 1.20)   |
| Neurological                                                                        | 2.75                                             | (0.67 to 11.28)    | 2.10        | (0.53 to 8.37)     | 7.07          | (1.39 to 35.97)¶   | 0.58                     | (0.38 to 0.88)¶  |
| Psychological                                                                       | 1.73                                             | (1.02 to 2.96)¶    | 2.02        | (1.19 to 3.45)§    | 1.78          | (0.98 to 3.23)     | 1.06                     | (0.89 to 1.25)   |
| Respiratory                                                                         | 4.24                                             | (3.00 to 6.00)**   | 3.66        | (2.66 to 5.05)**   | 2.94          | (2.00 to 4.30)**   | 1.00                     | (0.88 to 1.13)   |
| Nonspecific ill health                                                              | 2.31                                             | (1.26 to 4.25)§    | 2.91        | (1.58 to 5.34)**   | 1.74          | (0.90 to 3.37)     | 1.31                     | (1.07 to 1.60)§  |
| <b>Incidence‡</b>                                                                   |                                                  |                    |             |                    |               |                    |                          |                  |
| Gastrointestinal                                                                    | 1.23                                             | (0.53 to 2.87)     | 0.94        | (0.42 to 2.08)     | 1.50          | (0.63 to 3.58)     | 0.74                     | (0.60 to 0.92)§  |
| Musculoskeletal                                                                     | 2.09                                             | (1.34 to 3.26)¶    | 1.74        | (1.11 to 2.74)¶    | 1.80          | (1.11 to 2.93)¶    | 1.00                     | (0.86 to 1.15)   |
| Neurological                                                                        | 4.77                                             | (0.87 to 26.11)    | 2.94        | (0.59 to 14.69)    | 11.19         | (1.62 to 77.14)¶   | 0.48                     | (0.29 to 0.79)§  |
| Psychological                                                                       | 3.75                                             | (1.79 to 7.83)**   | 2.82        | (1.32 to 6.00)§    | 2.00          | (0.85 to 4.69)     | 1.05                     | (0.83 to 1.31)   |
| Respiratory                                                                         | 4.16                                             | (2.93 to 5.91)**   | 3.71        | (2.68 to 5.14)**   | 2.93          | (1.99 to 4.32)**   | 1.01                     | (0.89 to 1.15)   |
| Nonspecific ill health                                                              | 2.70                                             | (1.42 to 5.12)§    | 3.24        | (1.70 to 6.18)**   | 1.71          | (0.85 to 3.46)     | 1.37                     | (1.11 to 1.70)§  |
| <b>Frequency‡†</b>                                                                  |                                                  |                    |             |                    |               |                    |                          |                  |
|                                                                                     | <b>Risk ratios</b>                               |                    |             |                    |               |                    |                          |                  |
| Gastrointestinal                                                                    | 0.96                                             | (0.43 to 2.15)     | 0.84        | (0.39 to 1.80)     | 1.24          | (0.54 to 2.86)     | 0.75                     | (0.62 to 0.91)§  |
| Musculoskeletal                                                                     | 1.82                                             | (1.25 to 2.66)§    | 1.62        | (1.11 to 2.36)¶    | 1.61          | (1.08 to 2.42)¶    | 1.06                     | (0.94 to 1.19)   |
| Neurological                                                                        | 2.87                                             | (0.71 to 11.67)    | 2.07        | (0.54 to 7.94)     | 6.95          | (1.42 to 34.07)¶   | 0.58                     | (0.39 to 0.88)§  |
| Psychological                                                                       | 1.79                                             | (1.07 to 2.97)¶    | 1.93        | (1.16 to 3.22)¶    | 1.71          | (0.97 to 3.04)     | 1.05                     | (0.89 to 1.23)   |
| Respiratory                                                                         | 3.48                                             | (2.55 to 4.74)**   | 3.27        | (2.47 to 4.34)**   | 2.62          | (1.87 to 3.68)**   | 0.98                     | (0.88 to 1.10)   |
| Nonspecific ill health                                                              | 2.46                                             | (1.36 to 4.45)§    | 3.01        | (1.67 to 5.44)§    | 2.05          | (1.09 to 3.87)¶    | 1.24                     | (1.03 to 1.50)¶  |
| <b>Sick days‡†</b>                                                                  |                                                  |                    |             |                    |               |                    |                          |                  |
|                                                                                     | <b>Estimated <math>\beta</math> coefficients</b> |                    |             |                    |               |                    |                          |                  |
| Gastrointestinal                                                                    | -0.03                                            | (-0.47 to 0.40)    | -0.02       | (-0.45 to 0.42)    | 0.10          | (-0.26 to 0.45)    | -0.06                    | (-0.24 to 0.12)  |
| Musculoskeletal                                                                     | 0.54                                             | (-0.75 to 1.83)    | 0.70        | (-0.60 to 2.00)    | 0.65          | (-1.18 to 2.48)    | 0.34                     | (-0.18 to 0.87)  |
| Neurological                                                                        | 0.04                                             | (-0.43 to 0.50)    | 0.50        | (0.03 to 0.96)¶    | 0.84          | (0.23 to 1.44)§    | -0.08                    | (-0.25 to 0.10)  |
| Psychological                                                                       | 1.42                                             | (-0.25 to 3.08)    | 3.28        | (1.59 to 4.96)**   | 2.40          | (0.34 to 4.47)¶    | 0.28                     | (-0.31 to 0.87)  |
| Respiratory                                                                         | 1.19                                             | (0.62 to 1.76)¶    | 1.13        | (0.56 to 1.71)**   | 0.34          | (-0.33 to 1.01)    | 0.29                     | (0.09 to 0.48)§  |
| Nonspecific ill health                                                              | 0.13                                             | (-0.42 to 0.68)    | 0.23        | (-0.32 to 0.78)    | 0.25          | (-0.53 to 1.03)    | 0.05                     | (-0.17 to 0.27)  |
| <b>Duration‡†</b>                                                                   |                                                  |                    |             |                    |               |                    |                          |                  |
| Gastrointestinal                                                                    | 10.68                                            | (-12.69 to 34.05)  | 36.01       | (13.65 to 58.36)§  | 28.91         | (-2.77 to 60.59)   | 5.04                     | (-3.73 to 13.82) |
| Musculoskeletal                                                                     | 3.89                                             | (-17.27 to 25.06)  | 3.21        | (-18.22 to 24.65)  | 8.66          | (-14.88 to 32.19)  | -0.63                    | (-8.05 to 6.80)  |
| Neurological                                                                        | -58.63                                           | (-144.71 to 27.45) | 32.62       | (-51.30 to 116.55) | 132.09        | (42.30 to 221.87)§ | -20.48                   | (-44.65 to 3.69) |
| Psychological                                                                       | 72.54                                            | (24.79 to 120.30)§ | 46.79       | (-2.04 to 95.63)   | 52.86         | (-2.04 to 107.75)  | 6.10                     | (-9.05 to 21.24) |
| Respiratory                                                                         | 1.05                                             | (-3.07 to 5.18)    | 0.43        | (-3.36 to 4.22)    | -7.11         | (-12.95 to -1.26)¶ | 4.74                     | (2.52 to 6.97)** |
| Nonspecific ill health                                                              | 12.22                                            | (-3.86 to 28.29)   | 7.91        | (-8.19 to 24.01)   | -6.69         | (-26.15 to 12.78)  | 6.16                     | (-0.16 to 12.47) |

\*The coefficients in this table provide an index of the difference between the involved rescue workers and the control group in change of health-related sickness absences from pre- to postdisaster. Odds and rate ratios > 1 and estimated  $\beta$  coefficients > 0 indicate that the health of study workers deteriorated more than that of controls. All analyses were adjusted for sex, age, job experience and occupation.

†Measures whether the longer-term differences in sickness absence between study workers and controls were stable (ratios near 1), increasing (< 1) or decreasing (> 1) during postdisaster years 2 and 3.

‡Logistic regression.

§p < 0.01 between study workers and controls.

¶p < 0.05.

---

\*\*p < 0.001.

††Poisson regression.

‡‡Linear regression.
